# Supplementary material
Source: publisher site journal article supplement (https://www.dovepress.com/article/570670)
Supplement: Supplementary file 1 [file 570670%20Supplementary%20Material_1.pdf]

## **Supplementary material**

### **Synthesis and Biological Evaluation of Imidazopyridine-Isatin Hybrids as Inhibitors of *Leishmania major* Growth**



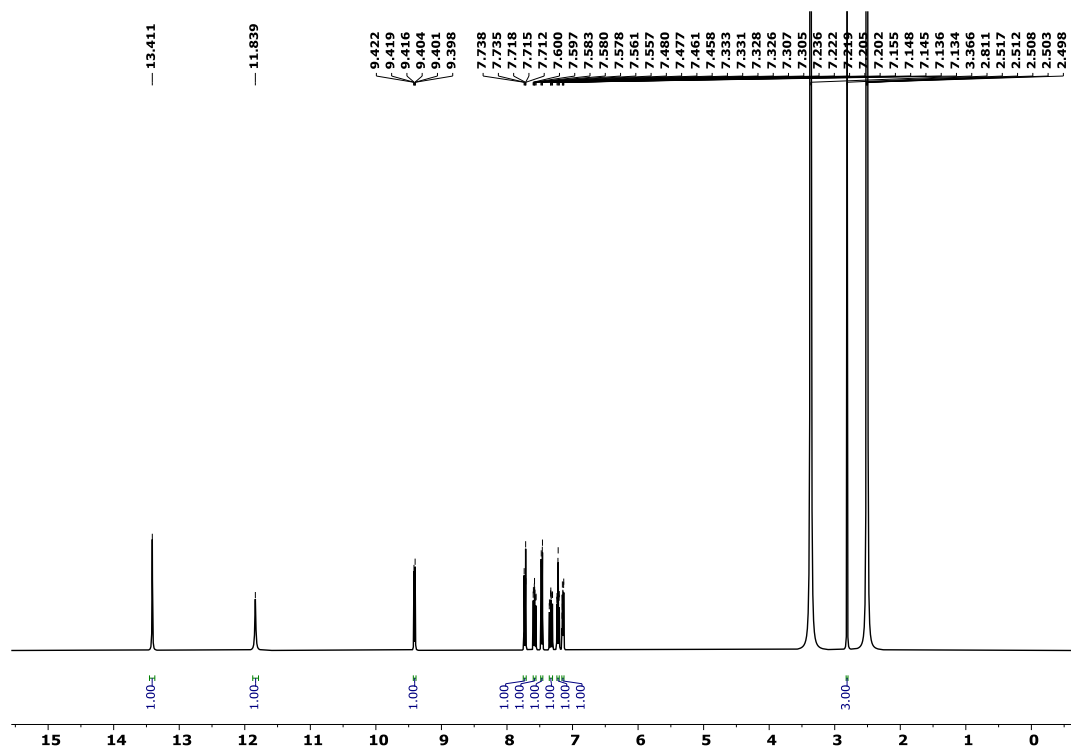

Figure S3.  $^1\text{H}$  NMR (400 MHz,  $\text{DMSO-}d_6$ ) spectrum of compound **5c**

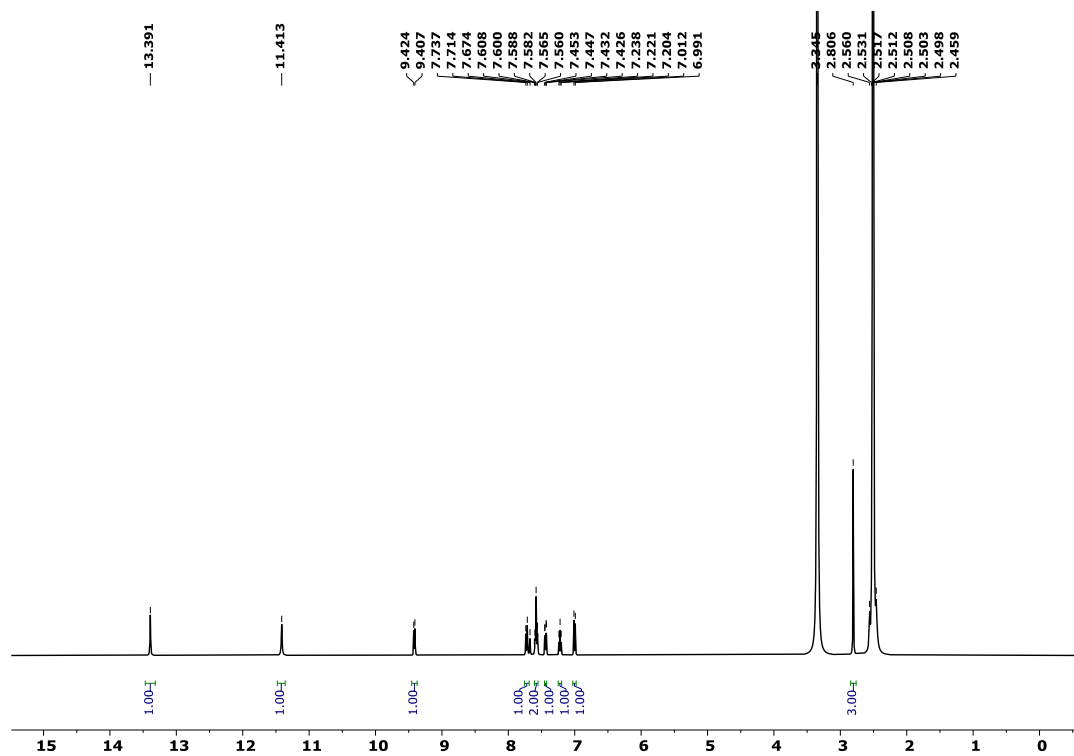

Figure S4.  $^1\text{H}$  NMR (400 MHz,  $\text{DMSO-}d_6$ ) spectrum of compound **5d**



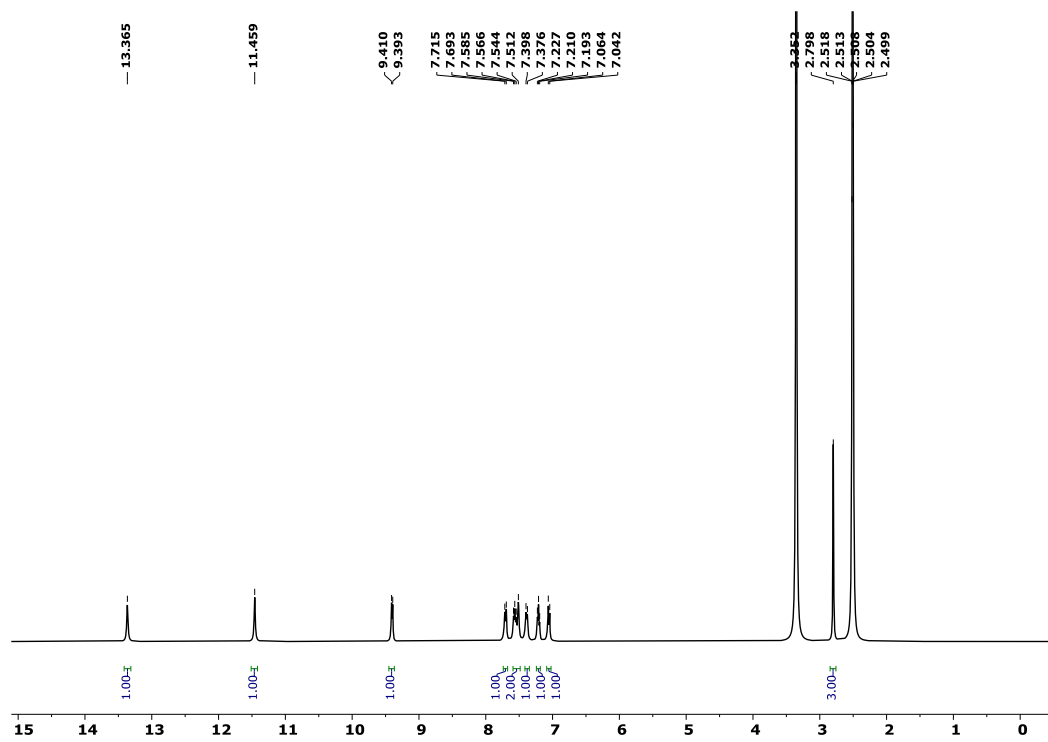

Figure S7.  $^1\text{H}$  NMR (400 MHz,  $\text{DMSO-}d_6$ ) spectrum of compound **5g**

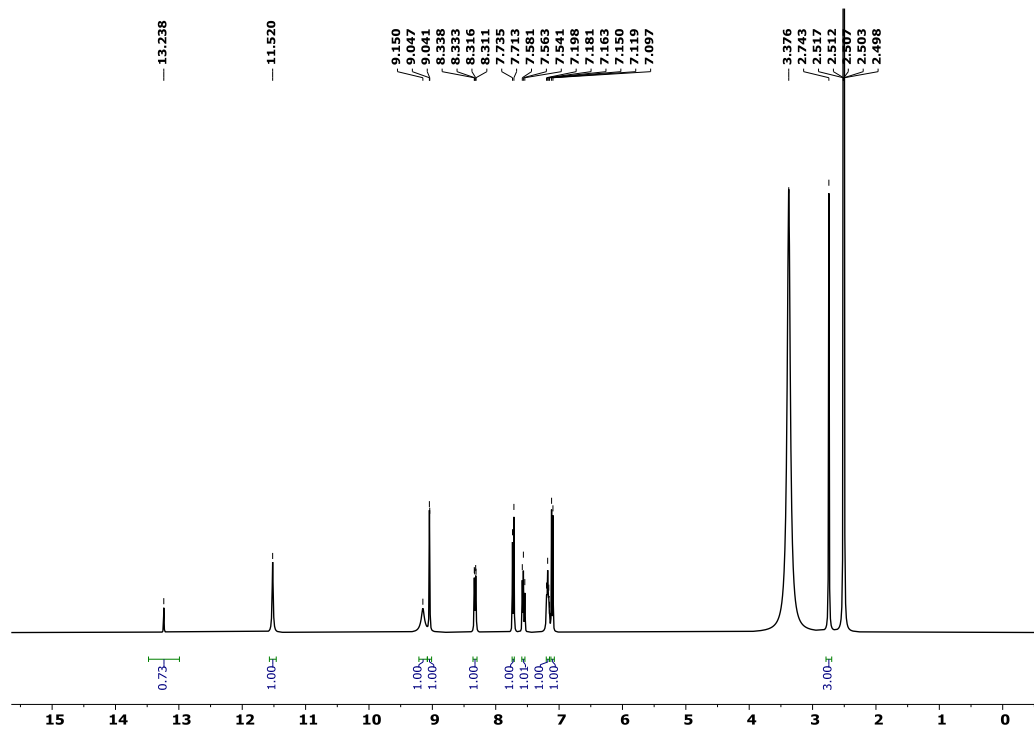

Figure S8.  $^1\text{H}$  NMR (400 MHz,  $\text{DMSO-}d_6$ ) spectrum of compound **5h**

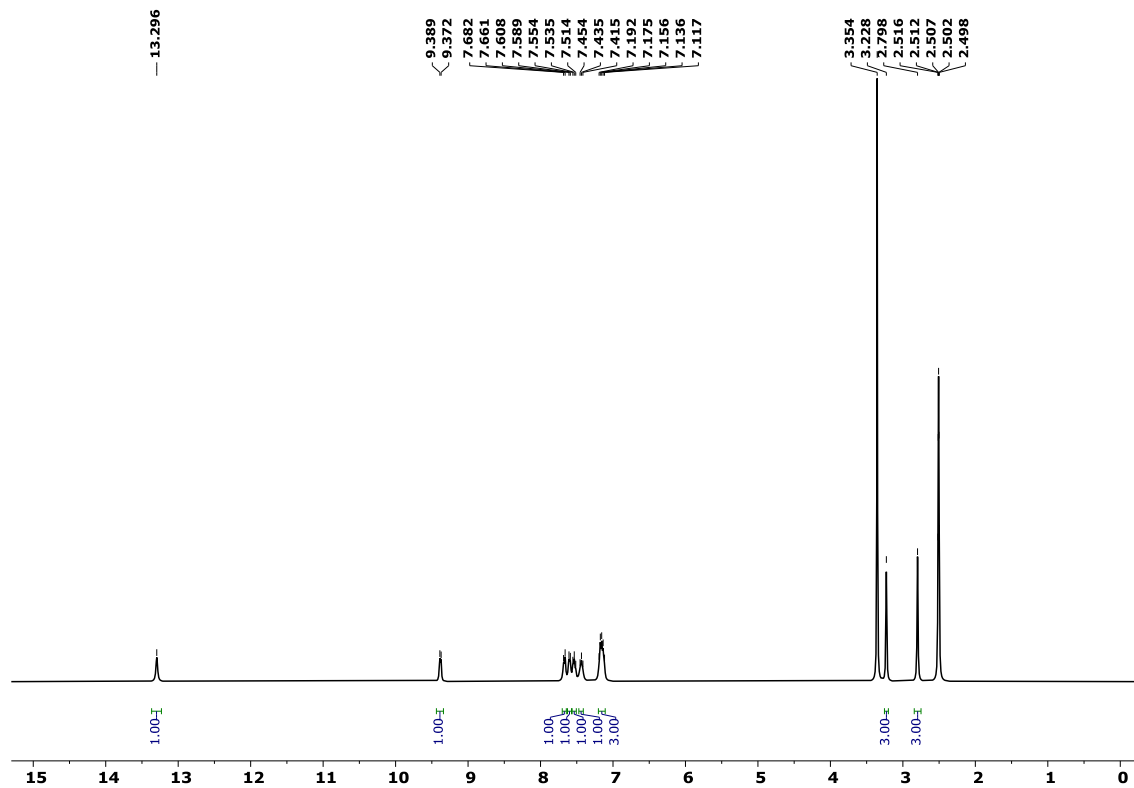

Figure S9.  $^1\text{H}$  NMR (400 MHz,  $\text{DMSO-}d_6$ ) spectrum of compound **8a**

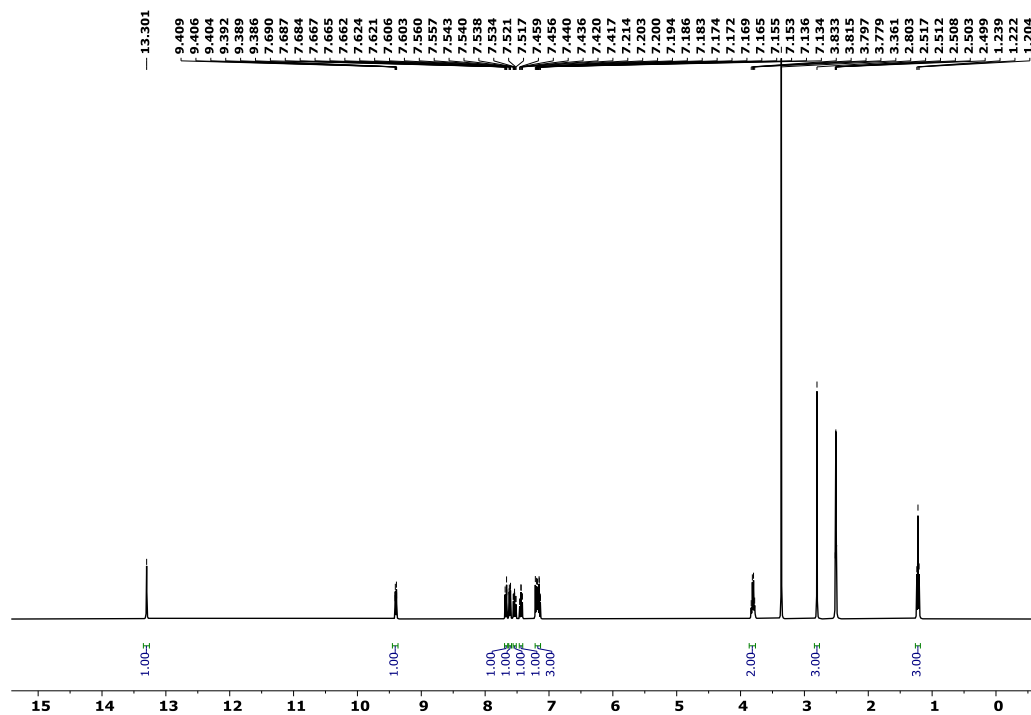

Figure S10.  $^1\text{H}$  NMR (400 MHz,  $\text{DMSO-}d_6$ ) spectrum of compound **8b**

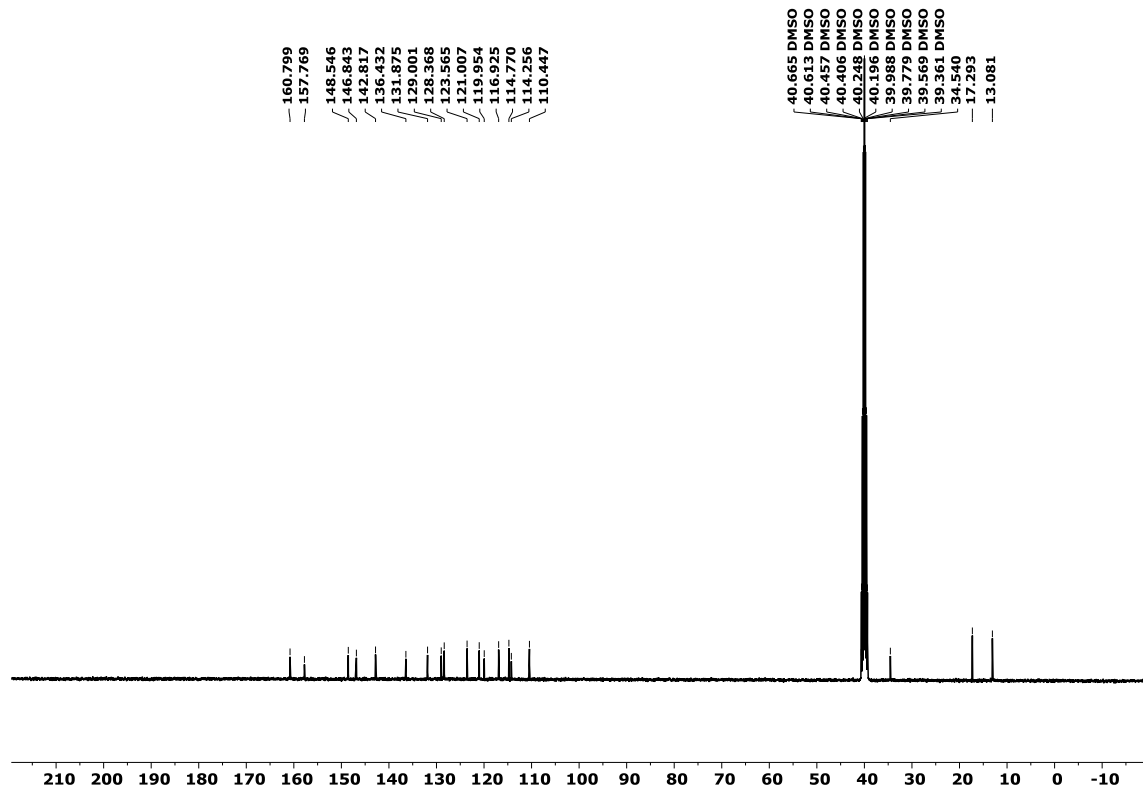

Figure S11.  $^{13}\text{C}$  NMR (100 MHz,  $\text{DMSO-}d_6$ ) spectrum of compound **8b**

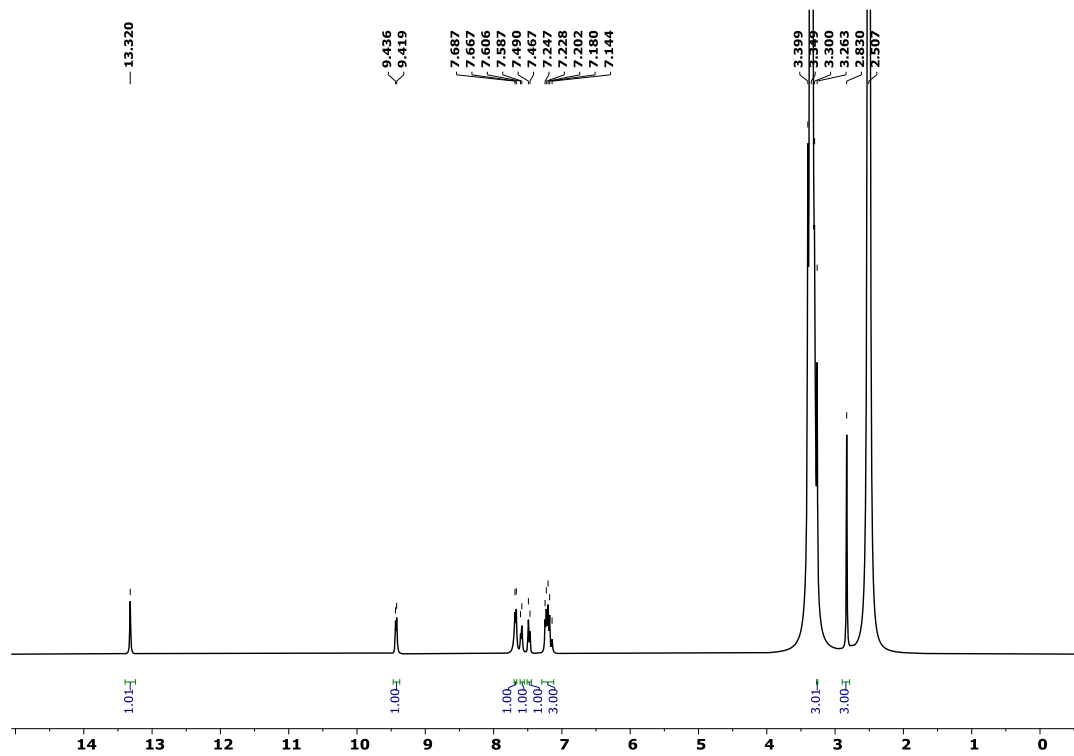

Figure S12.  $^1\text{H}$  NMR (400 MHz,  $\text{DMSO-}d_6$ ) spectrum of compound **8d**

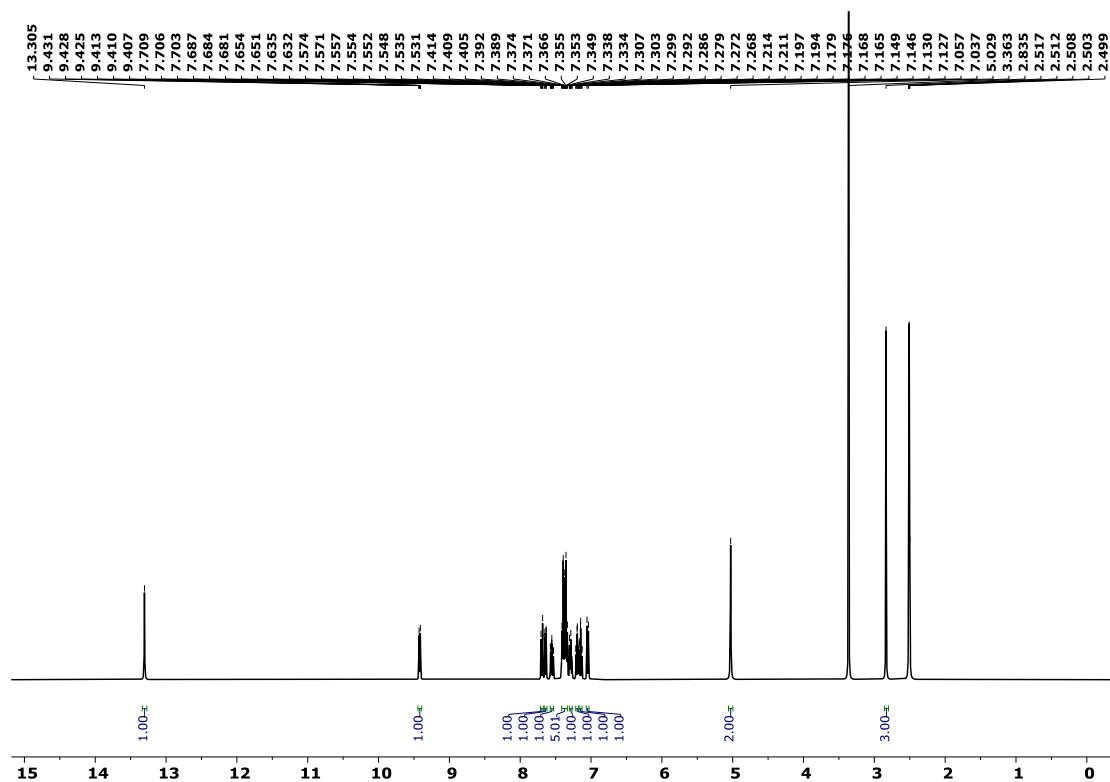

Figure S13.  $^1\text{H}$  NMR (400 MHz,  $\text{DMSO-}d_6$ ) spectrum of compound **11a**

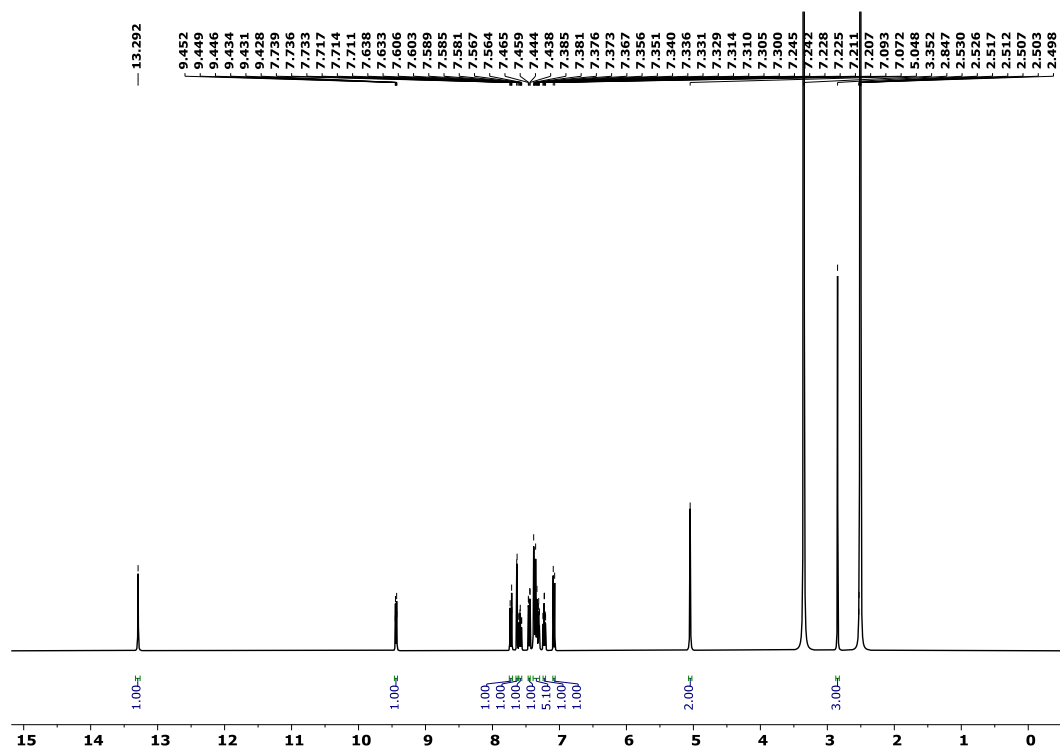

Figure S14.  $^1\text{H}$  NMR (400 MHz,  $\text{DMSO-}d_6$ ) spectrum of compound **11c**

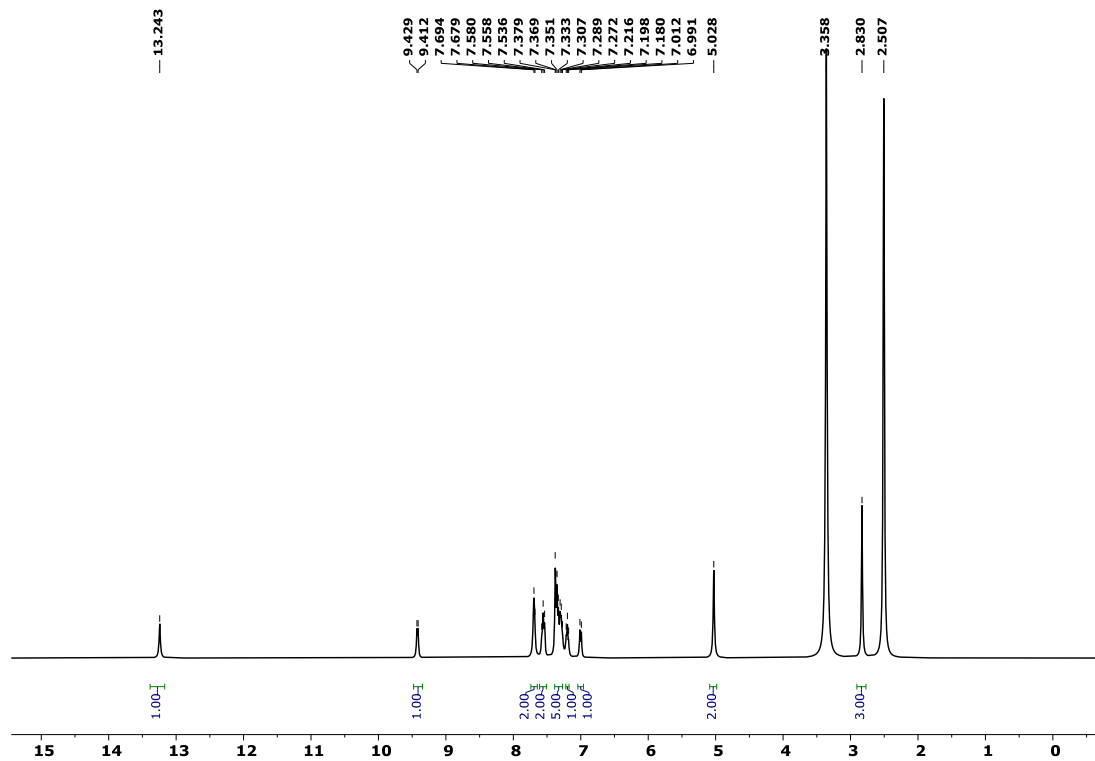

Figure S15.  $^1\text{H}$  NMR (400 MHz,  $\text{DMSO-}d_6$ ) spectrum of compound **11d**

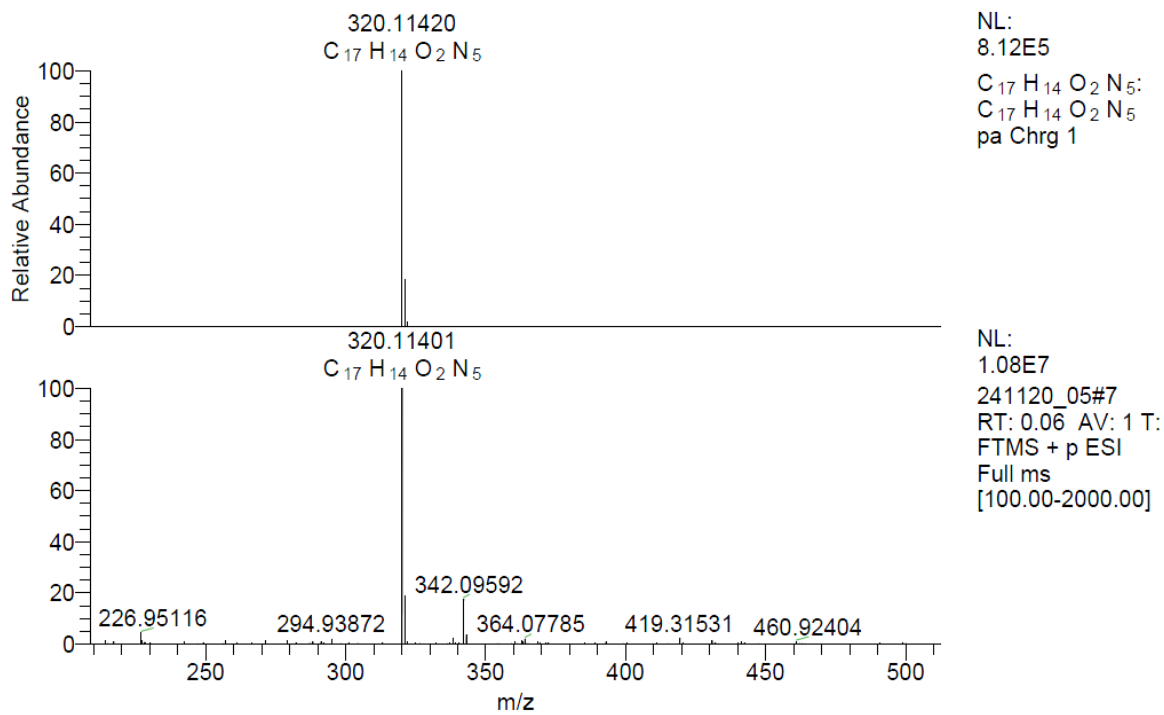

Figure S16. HRMS spectrum of compound **5a**

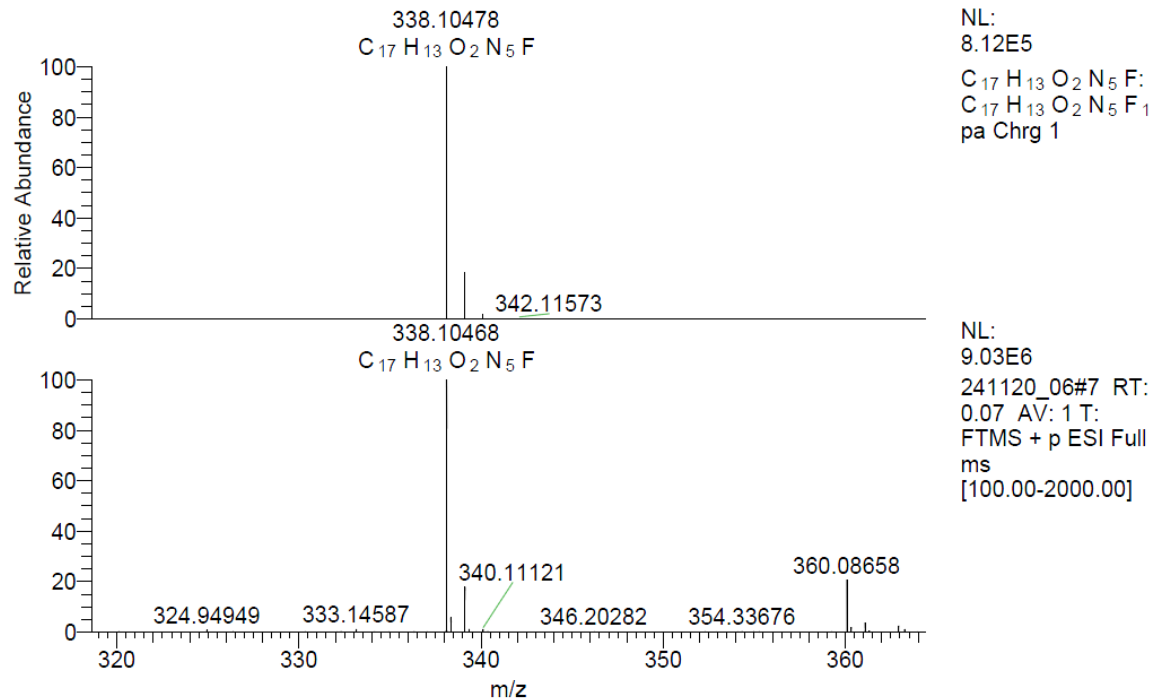

**Figure S17.** HRMS spectrum of compound **5b**

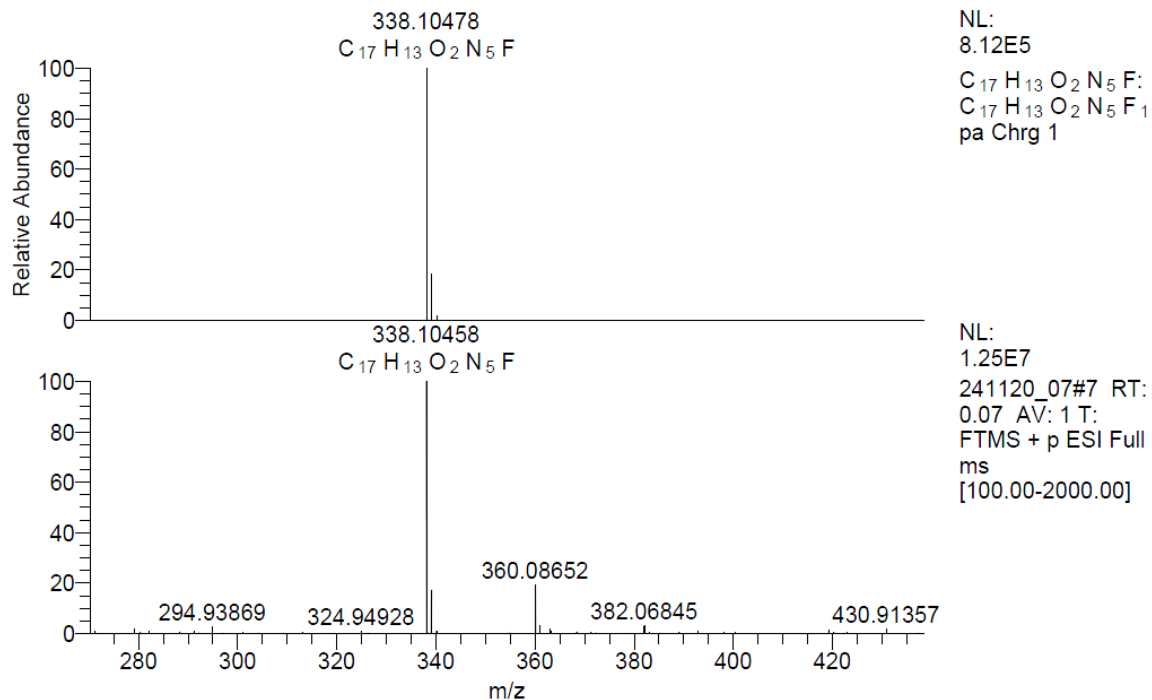

**Figure S18.** HRMS spectrum of compound **5c**

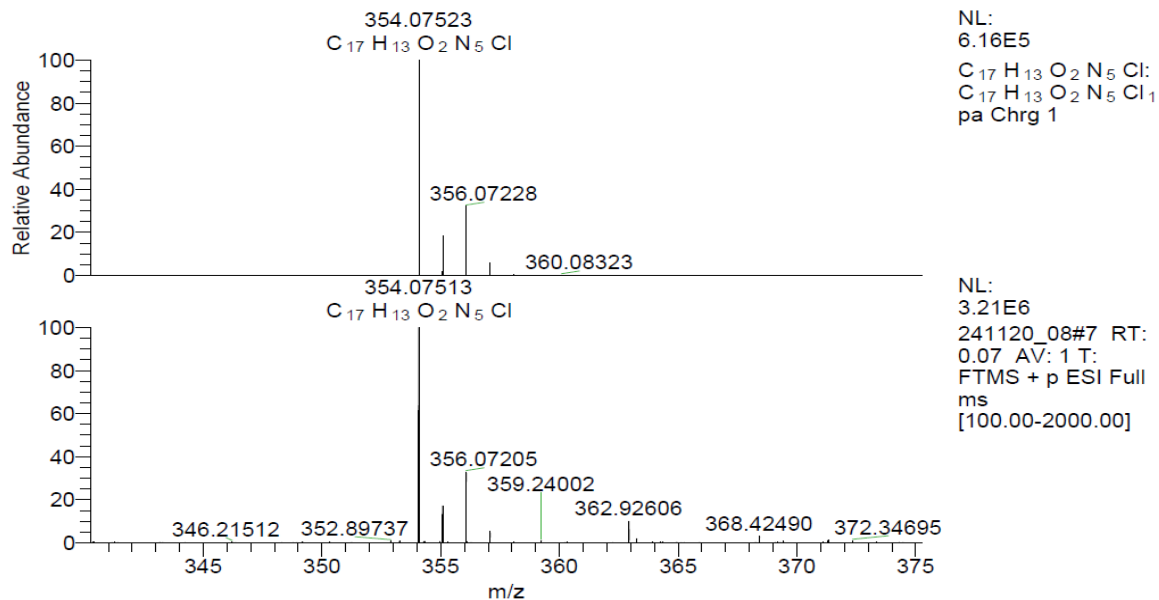

**Figure S19.** HRMS spectrum of compound **5d**

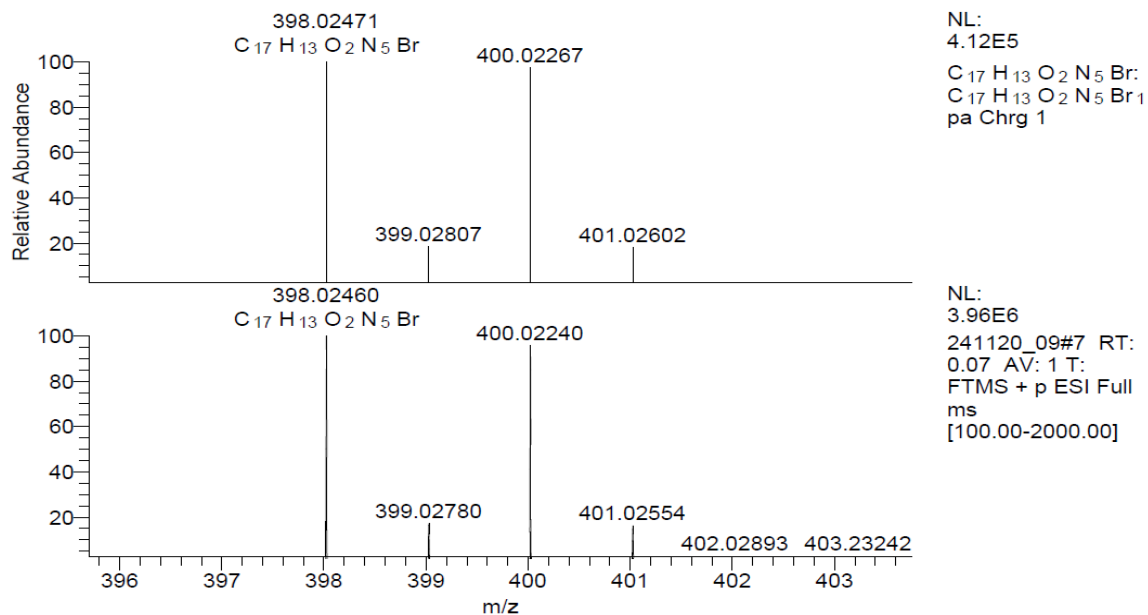

**Figure S20.** HRMS spectrum of compound **5e**

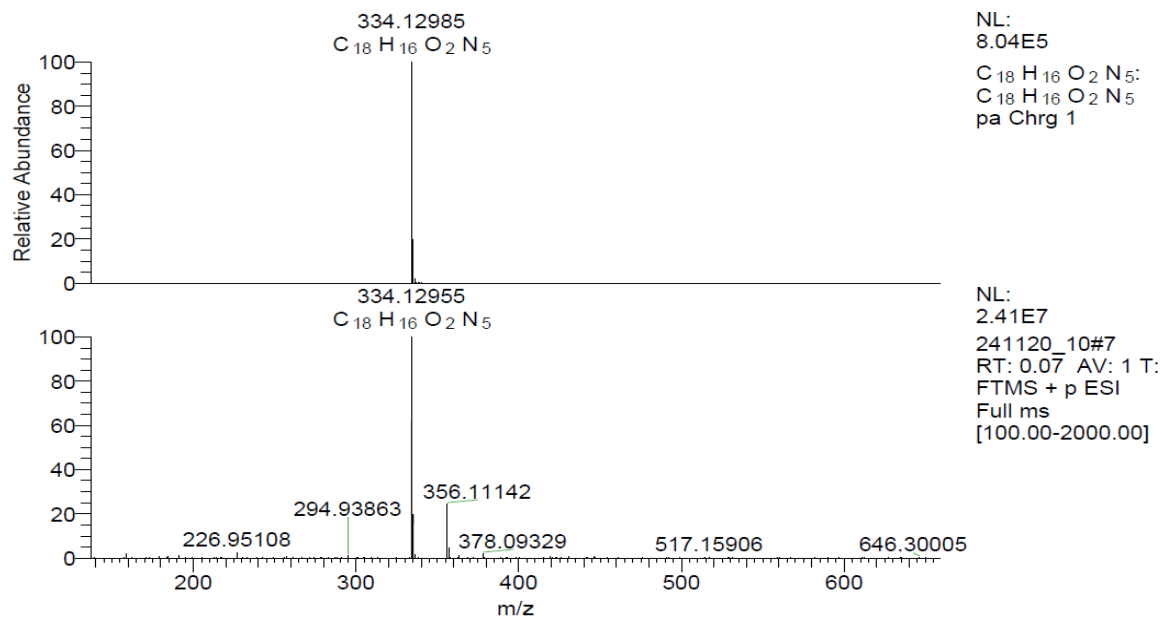

**Figure S21.** HRMS spectrum of compound **5f**

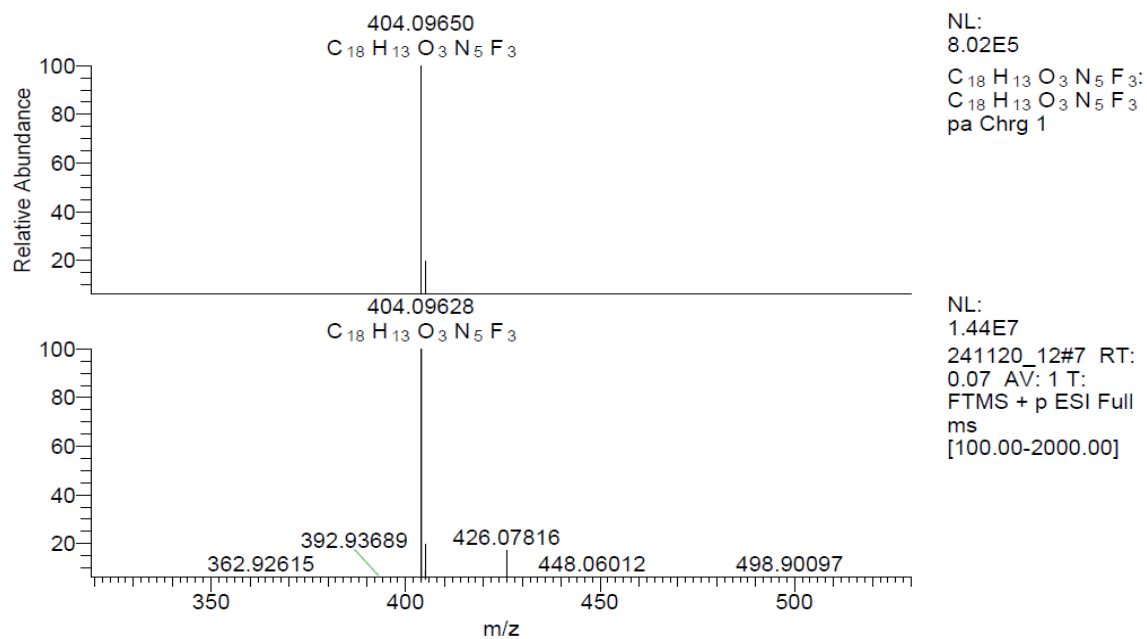

**Figure S22.** HRMS spectrum of compound **5g**

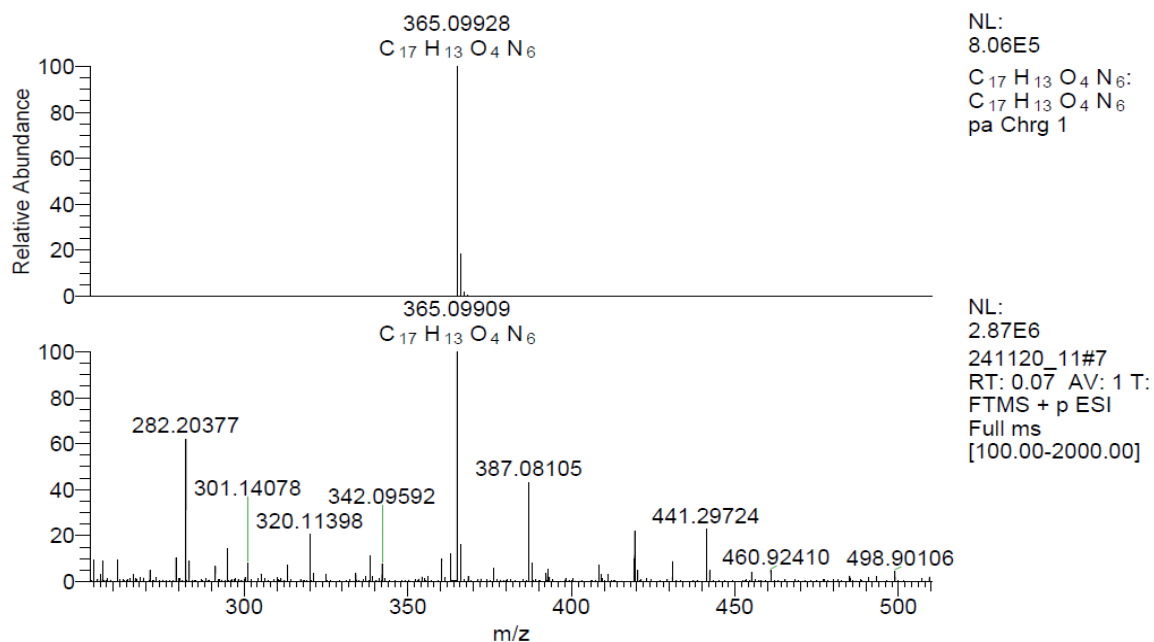

**Figure S23.** HRMS spectrum of compound **5h**

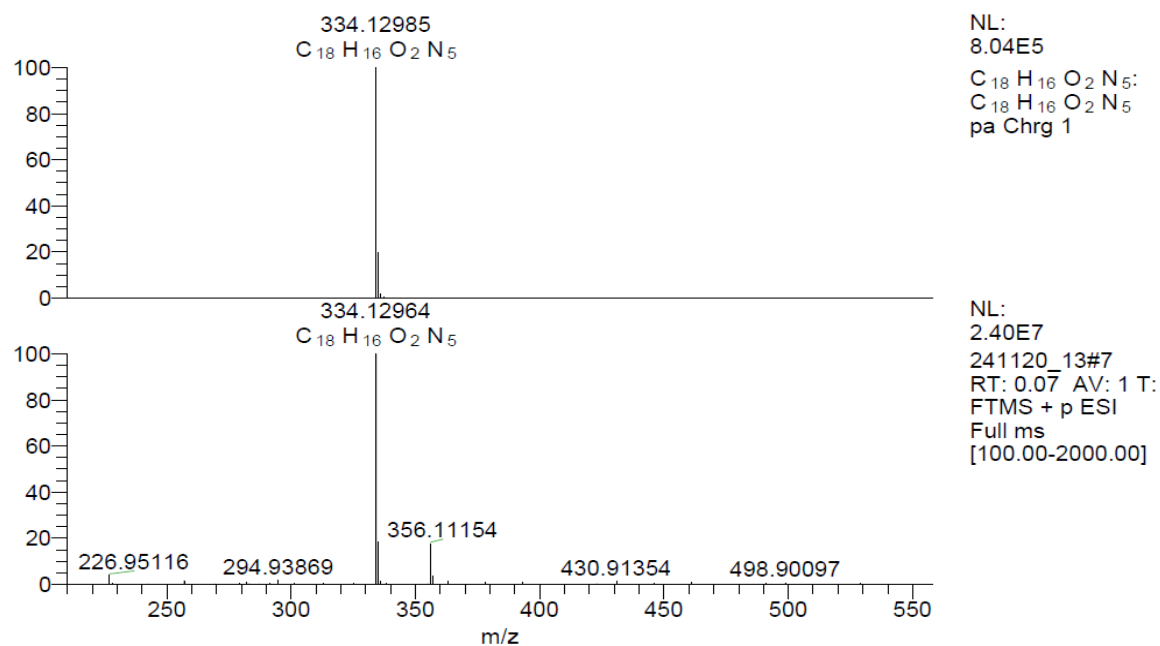

**Figure S24.** HRMS spectrum of compound **8a**

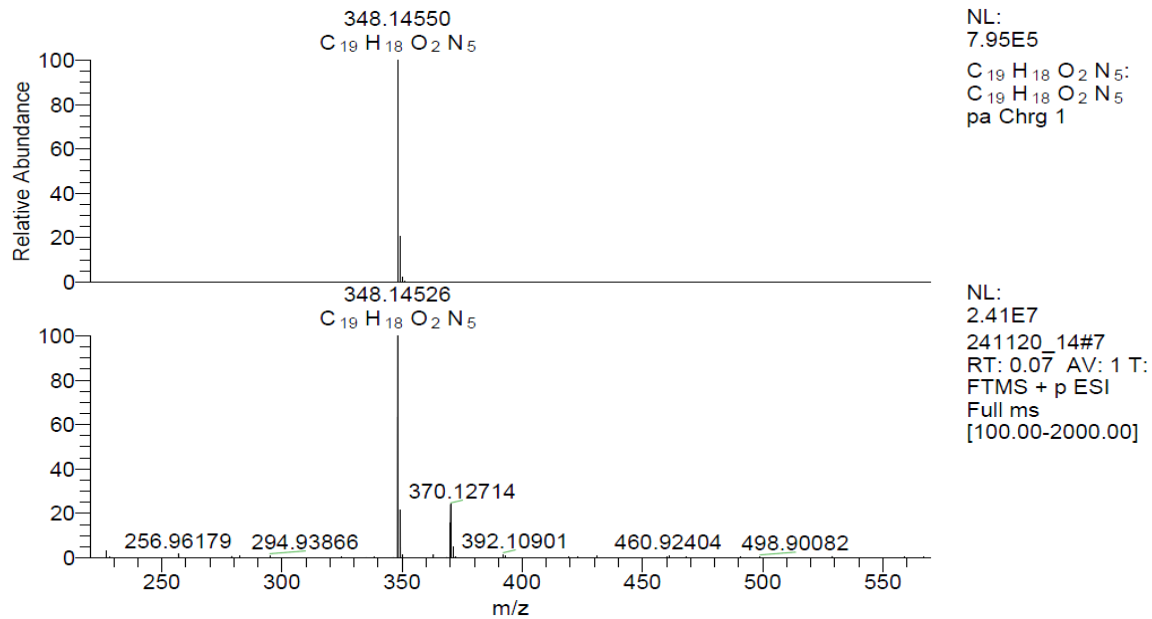

**Figure S25.** HRMS spectrum of compound **8b**

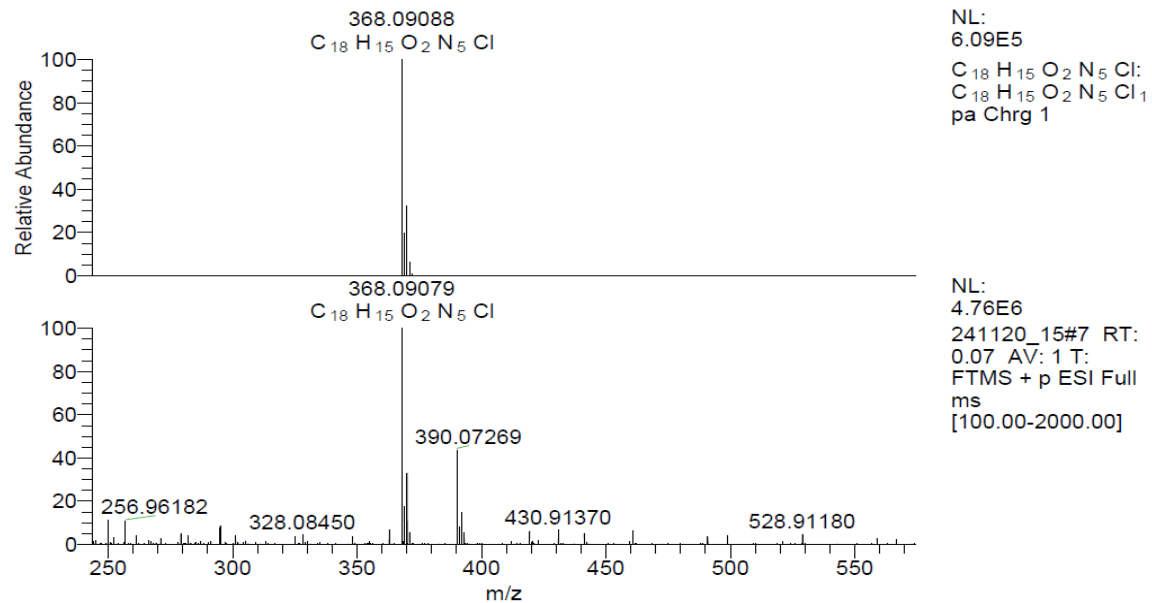

**Figure S26.** HRMS spectrum of compound **8c**

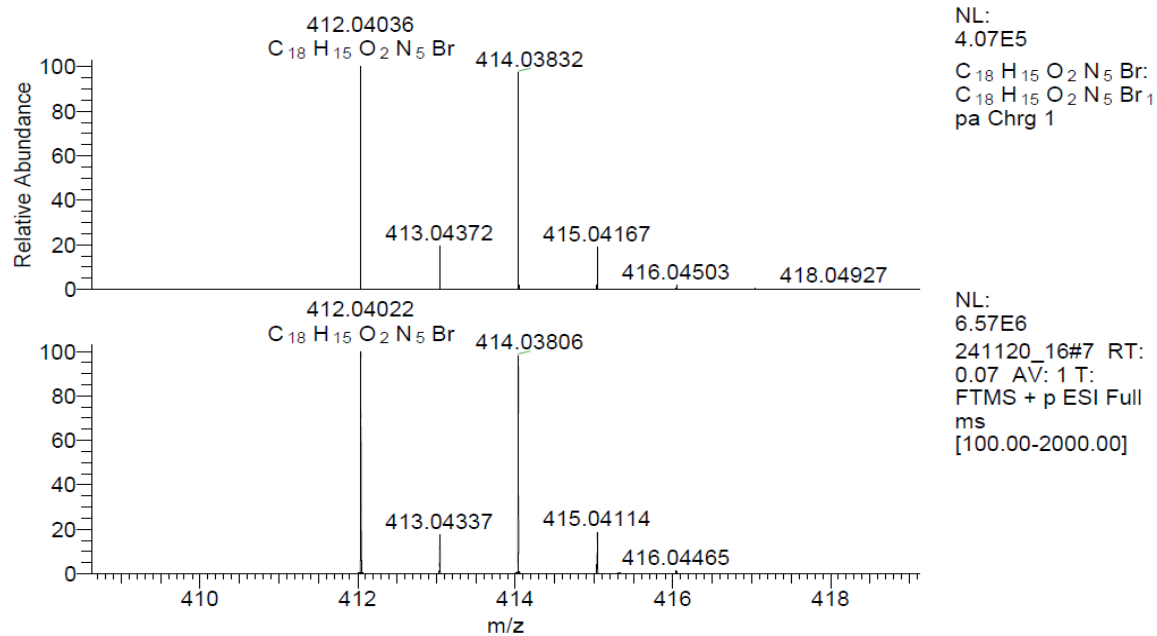

Figure S27. HRMS spectrum of compound **8d**

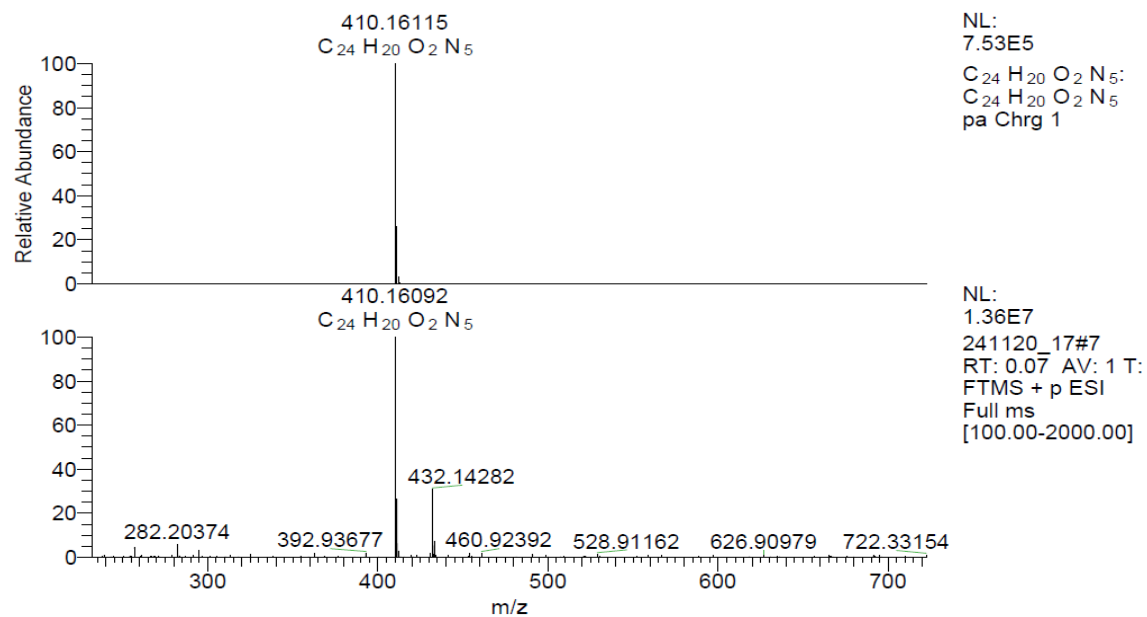

Figure S28. HRMS spectrum of compound **11a**

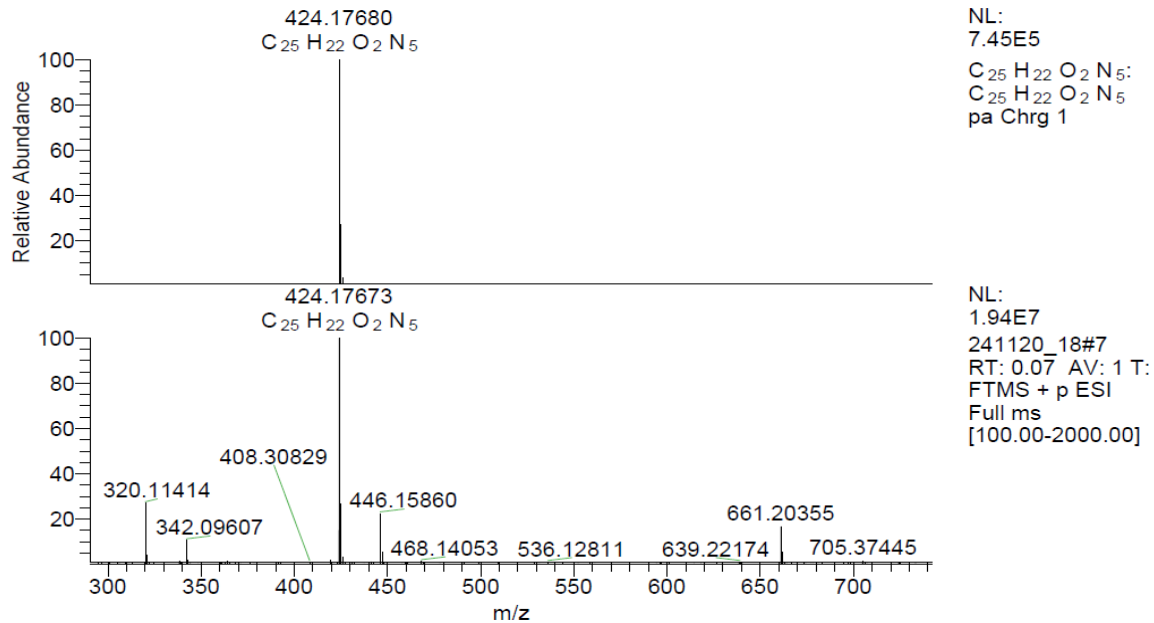

**Figure S29.** HRMS spectrum of compound **11b**

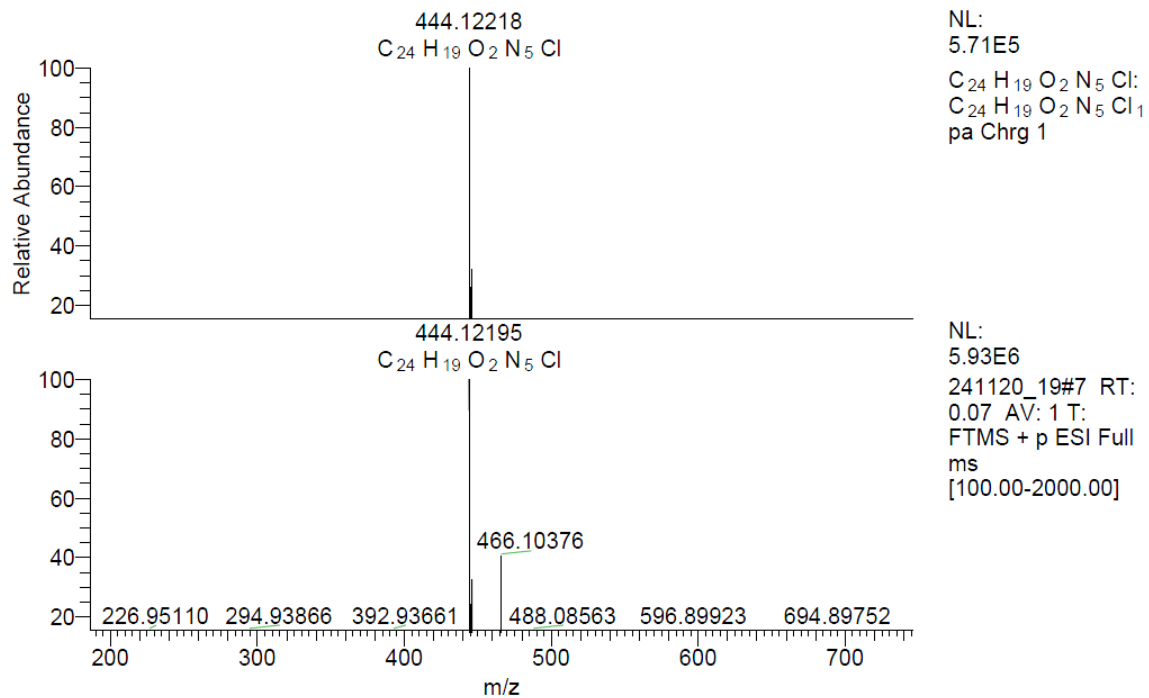

**Figure S30.** HRMS spectrum of compound **11c**

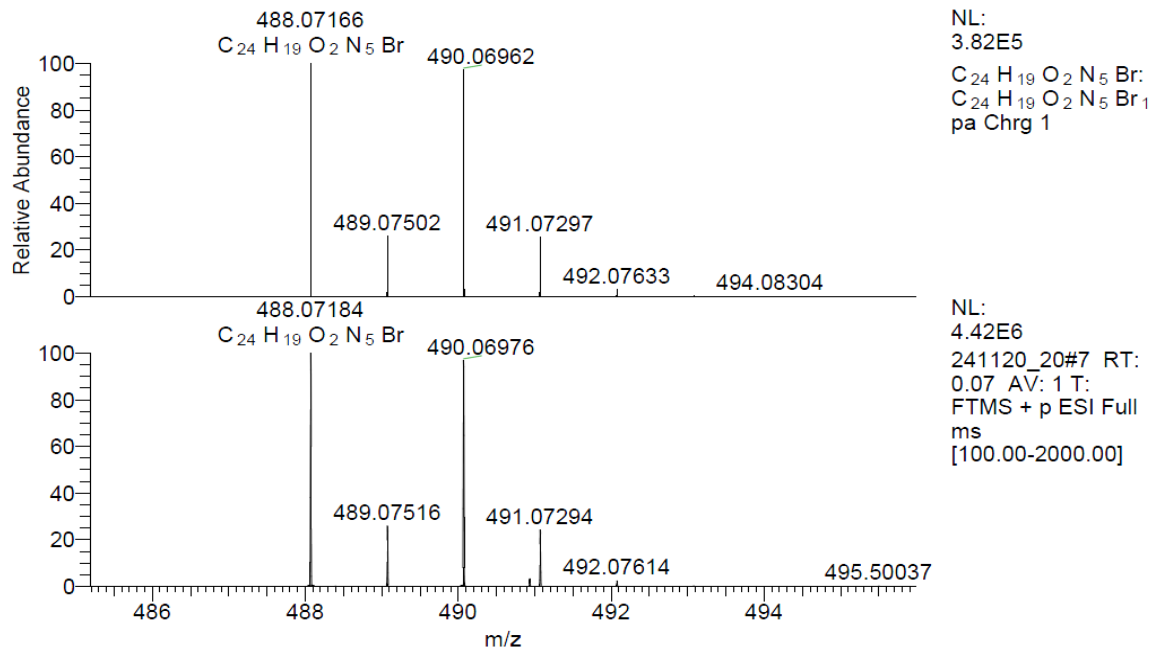

Figure S31. HRMS spectrum of compound 11d

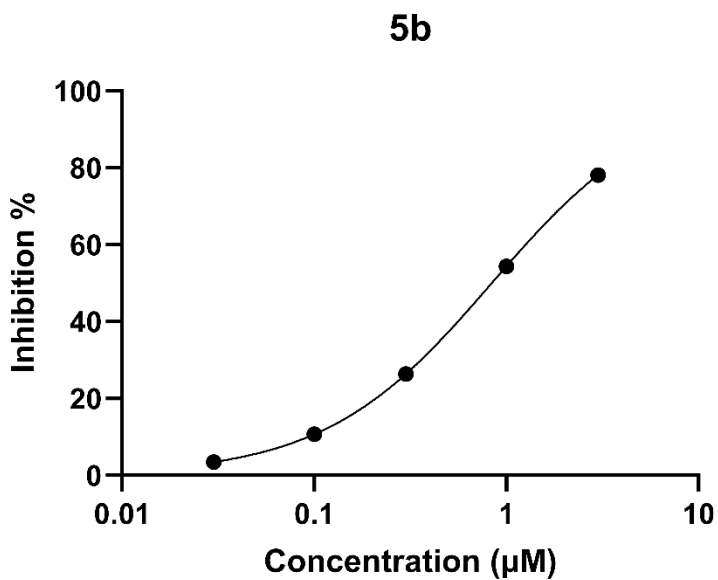

Figure S32. Dose response curve for inhibition % versus concentration ( $\mu\text{M}$ ) of compound 5b
